# Supplementary material for: The intestinal microbiome is a co-determinant of the postprandial plasma glucose response
Source: PLoS One. 2020 Sep 18;15(9):e0238648. doi: 10.1371/journal.pone.0238648 (PMC7500969; doi:10.1371/journal.pone.0238648)
Supplement: S1 Table — (XLSX) [file pone.0238648.s013.xlsx]

## Sheet: S1 table
	Hypotheses features to be selected among		Explorative features to be selected among
Category	Number of features	Features	Number of features	Features
Phenomics	7	Age, systolic BP, BMI, SAD, gender, FFM %, ITT	12	Age, systolic and diastolic BP, BMI, SAD, FFM %, FM, ITT, hunger, Bristol, smoker, gender
Biochemical feature	1	hsCRP	15	hsCRP, IL6, TNF⍺, TC, HDL, LDL, triglycerides, FFA, ALAT, ASAT, WBC, HGB, HCT, zonulin, GLP2
Lifestyle data	4	Fiber intake, energy intake, hunger, smoking status	7	Fiber intake, energy intake, protein intake, fat intake, carbohydrate intake, intake of added sugar, alcohol intake
Microbial characteristics	3	MGS richness, shannon diversity, gene richness	5	Cell count, cell count mean index, MGS richness, gene richness, shannon diversity
Microbial taxa	11	Bifidobacteria, F. Prausnitzii, Roseburia, Akkermansia, Alistipes, Proteobacteria, Enterobacteriaceae, Prevotellaceae, Clostridiales, Bacteroidiales, Bacteroidia	779	Metagenomics species
Microbial functional KEGG modules	10	M00225, M00226, M00229, M00233, M00317, M00324, M00331, M00332, M00529, M00530	451	KEGG modules
			99	GMM modules
Total number of features	36		1368
